# Supplementary material
Source: PubMed Central journal article supplement (PMC2200831)
Supplement: blood_blood-2007-05-088310_1.pdf [file blood_blood-2007-05-088310_1.pdf]

|  |                          |                     |     |                 |
|--|--------------------------|---------------------|-----|-----------------|
|  | <b>Dup 12p neg.</b>      | <b>Dup 12p</b>      |     |                 |
|  | Dup 21q neg.             | 359                 | 3   |                 |
|  | Dup 21q                  | 27                  | 10  | <b>p=0.0000</b> |
|  | <b>Del 8p neg.</b>       | <b>Del 8p</b>       |     |                 |
|  | Dup Xq neg.              | 369                 | 7   |                 |
|  | Dup Xq                   | 17                  | 6   | <b>p=0.0000</b> |
|  | <b>Del 4q neg.</b>       | <b>Del 4q</b>       |     |                 |
|  | DMD Del neg.             | 387                 | 5   |                 |
|  | DMD Del                  | 5                   | 3   | <b>p=0.0002</b> |
|  | <b>Del 6q neg.</b>       | <b>Del 6q</b>       |     |                 |
|  | Dup Xq neg.              | 339                 | 37  |                 |
|  | Dup Xq                   | 14                  | 9   | <b>p=0.0004</b> |
|  | <b>ETV6 Del neg.</b>     | <b>ETV6 Del</b>     |     |                 |
|  | Dup 21q neg.             | 320                 | 42  |                 |
|  | Dup 21q                  | 24                  | 13  | <b>p=0.0004</b> |
|  | <b>Gain chr. 21 neg.</b> | <b>Gain chr. 21</b> |     |                 |
|  | Gain chr. X neg.         | 347                 | 29  |                 |
|  | Gain chr. X              | 15                  | 8   | <b>p=0.0005</b> |
|  | <b>non-HD</b>            | <b>HD</b>           |     |                 |
|  | Del 6q neg.              | 243                 | 110 |                 |
|  | Del 6q                   | 42                  | 4   | <b>p=0.0009</b> |
|  | <b>Del 20q neg.</b>      | <b>Del 20q</b>      |     |                 |
|  | p16Del neg.              | 313                 | 5   |                 |
|  | p16Del                   | 73                  | 8   | <b>p=0.0011</b> |
|  | <b>Dup 1q neg.</b>       | <b>Dup 1q</b>       |     |                 |
|  | Dup/Amp 9q neg.          | 351                 | 39  |                 |
|  | Dup/Amp 9q               | 4                   | 5   | <b>P=0.0012</b> |
|  | <b>ETV6 Del neg.</b>     | <b>ETV6 Del</b>     |     |                 |
|  | Dup 1q neg.              | 271                 | 84  |                 |
|  | Dup 1q                   | 42                  | 2   | <b>p=0.0017</b> |
|  | <b>Del 3p21 neg.</b>     | <b>Del 3p21</b>     |     |                 |
|  | ETV6 Del neg.            | 312                 | 1   |                 |
|  | ETV6 Del                 | 81                  | 5   | <b>p=0.0021</b> |
|  | <b>Del 1q neg.</b>       | <b>Del 1q</b>       |     |                 |
|  | ETV6 Del neg.            | 309                 | 4   |                 |
|  | ETV6 Del                 | 79                  | 7   | <b>p=0.0027</b> |
|  | <b>Del 20q neg.</b>      | <b>Del 20q</b>      |     |                 |
|  | Dup 21q neg.             | 354                 | 8   |                 |
|  | Dup 21q                  | 32                  | 5   | <b>p=0.0039</b> |

|                           |                      |                 |  |                 |
|---------------------------|----------------------|-----------------|--|-----------------|
|                           | <b>FHIT Del neg.</b> | <b>FHIT Del</b> |  |                 |
| <b>ETV6 Del neg.</b>      | <b>342</b>           | <b>2</b>        |  |                 |
| <b>ETV6 Del</b>           | <b>51</b>            | <b>4</b>        |  | <b>p=0.0040</b> |
|                           | <b>non-HD</b>        | <b>HD</b>       |  |                 |
| <b>Dup 1q neg.</b>        | <b>275</b>           | <b>80</b>       |  |                 |
| <b>Dup 1q</b>             | <b>25</b>            | <b>19</b>       |  | <b>p=0.0049</b> |
|                           | <b>Del 15q neg.</b>  | <b>Del 15q</b>  |  |                 |
| <b>ETV6 Del neg.</b>      | <b>311</b>           | <b>2</b>        |  |                 |
| <b>ETV6 Del</b>           | <b>81</b>            | <b>5</b>        |  | <b>p=0.0061</b> |
|                           | <b>Del 4q neg.</b>   | <b>Del 4q</b>   |  |                 |
| <b>ETV6 Del neg.</b>      | <b>311</b>           | <b>2</b>        |  |                 |
| <b>ETV6 Del</b>           | <b>81</b>            | <b>5</b>        |  | <b>p=0.0061</b> |
|                           | <b>ETV6 Del neg.</b> | <b>ETV6 Del</b> |  |                 |
| <b>Whole Chr UPD neg.</b> | <b>277</b>           | <b>84</b>       |  |                 |
| <b>Whole Chr UPD</b>      | <b>36</b>            | <b>2</b>        |  | <b>p=0.0068</b> |
|                           | <b>Dup 17q neg.</b>  | <b>Dup 17q</b>  |  |                 |
| <b>non-HD</b>             | <b>282</b>           | <b>3</b>        |  |                 |
| <b>HD</b>                 | <b>107</b>           | <b>7</b>        |  | <b>p=0.0072</b> |
|                           | <b>non-HD</b>        | <b>HD</b>       |  |                 |
| <b>17q Dup neg.</b>       | <b>282</b>           | <b>107</b>      |  |                 |
| <b>17q Dup</b>            | <b>3</b>             | <b>7</b>        |  | <b>p=0.0072</b> |
|                           | <b>Del 20p neg.</b>  | <b>Del 20p</b>  |  |                 |
| <b>TBL1XR1 Del neg.</b>   | <b>385</b>           | <b>4</b>        |  |                 |
| <b>TBL1XR1 Del</b>        | <b>8</b>             | <b>2</b>        |  | <b>p=0.0081</b> |
|                           | <b>Del 20p neg.</b>  | <b>Del 20</b>   |  |                 |
| <b>Del 7p neg.</b>        | <b>385</b>           | <b>4</b>        |  |                 |
| <b>Del 7p</b>             | <b>8</b>             | <b>2</b>        |  | <b>p=0.0081</b> |
|                           | <b>Del 3p21 neg.</b> | <b>Del 3p21</b> |  |                 |
| <b>Del 1q neg.</b>        | <b>384</b>           | <b>4</b>        |  |                 |
| <b>Del 1q</b>             | <b>9</b>             | <b>2</b>        |  | <b>p=0.0098</b> |
