# Supplementary material
Source: PubMed Central journal article supplement (PMC2200831)
Supplement: blood_blood-2007-05-088310_2.pdf [file blood_blood-2007-05-088310_2.pdf]

**2p Allele qPCR primers**      **5'-GGC AAT CCT GGC TGC GGA TCA AGA-3'**  
**5'- ATT TCT GAA CTT CTT GGC TGC C-3'**

**9p Allele qPCR primers,**      **5'-TTA GAG GCC TAT TTA CAG CAC-3'**  
**5'- AGC TAC TTC TTA GAA TCA TGC-3'**

**9q Allele qPCR primers,**      **5'- TCT AAT TGA ATG TAG TAT GTA G-3'**  
**5'-GTT GCT CCC AGT CAT TCTTTA T-3'**

**SNP rs9298995 PCR primres,**    **5'-CAG TGG GCA AGT CTT TGG GAT-3'**  
**5'- GTG TGC AAA AGG TAC TAG CCT T-3'**

**SNP rs10511573 PCR primres,** **5-TAC TTC TGC TAC GCT CAA TTA-3'**  
**5'- CAT AGC TCC AGG GTA TAT TCA-3'**

**SNP rs10512273 PCR primres,** **5'-GCC AAA TGC TGA GTT TGT A-3'**  
**5'-AAC AAT GAA TGA AGA ATG TTG-3'**

**SNP rs2151642 PCR primres,**    **5'-CTT GGG TCC GCA GGA TAC GTT-3'**  
**5'- GGG CAT GGT GAT GGA GTG GTC-3'**
