# Supplementary material
Source: PubMed Central journal article supplement (PMC2200831)

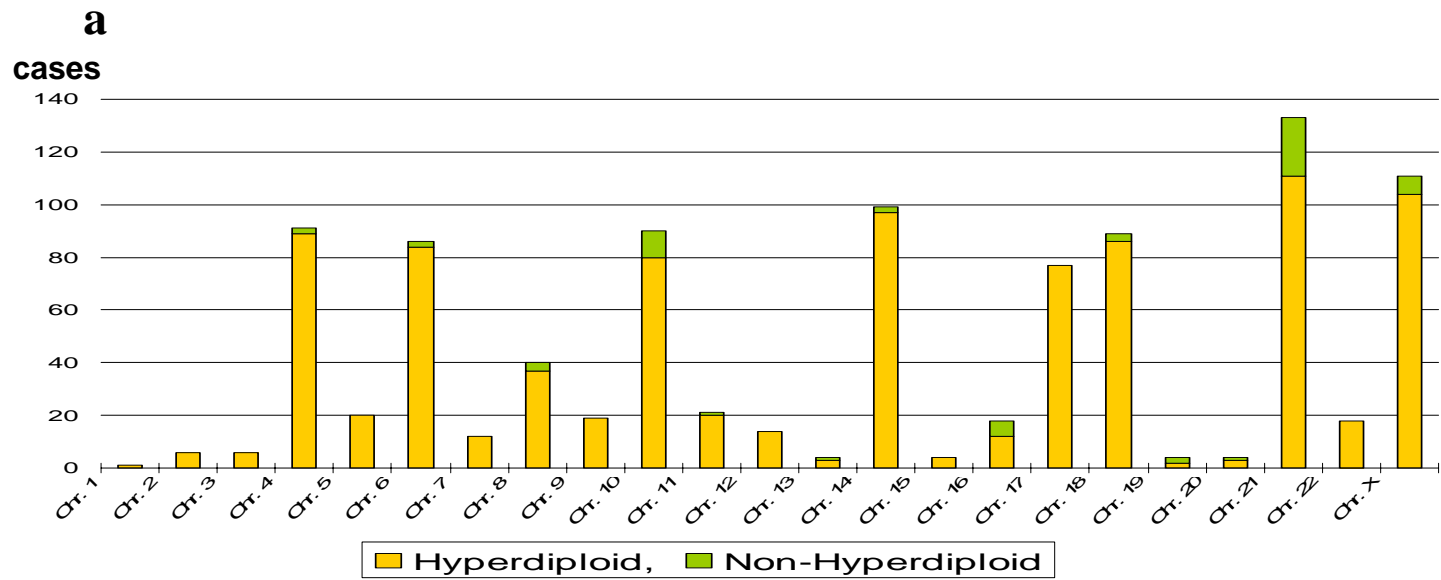

**b**

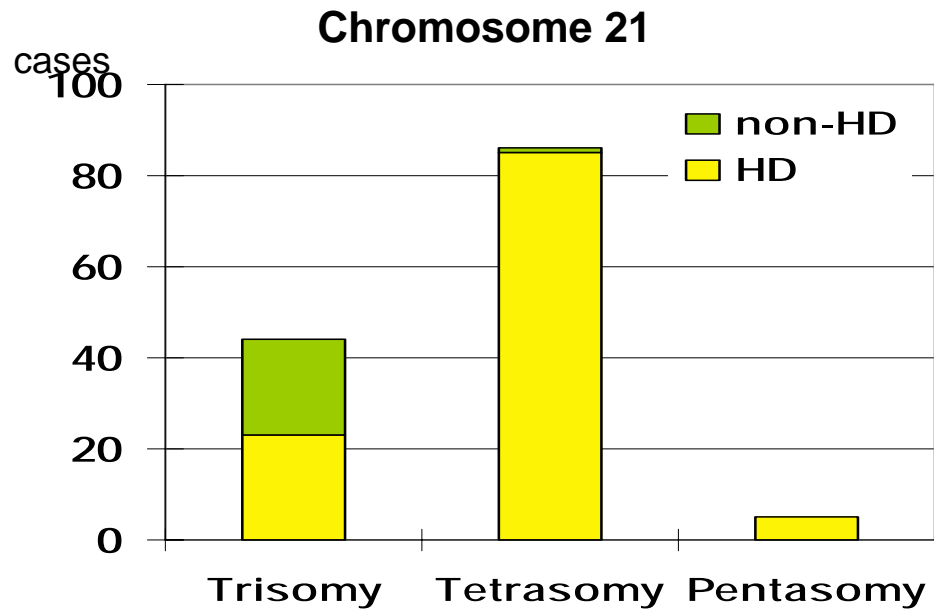

Supplement: blood_blood-2007-05-088310_3.pdf [file blood_blood-2007-05-088310_3.pdf]

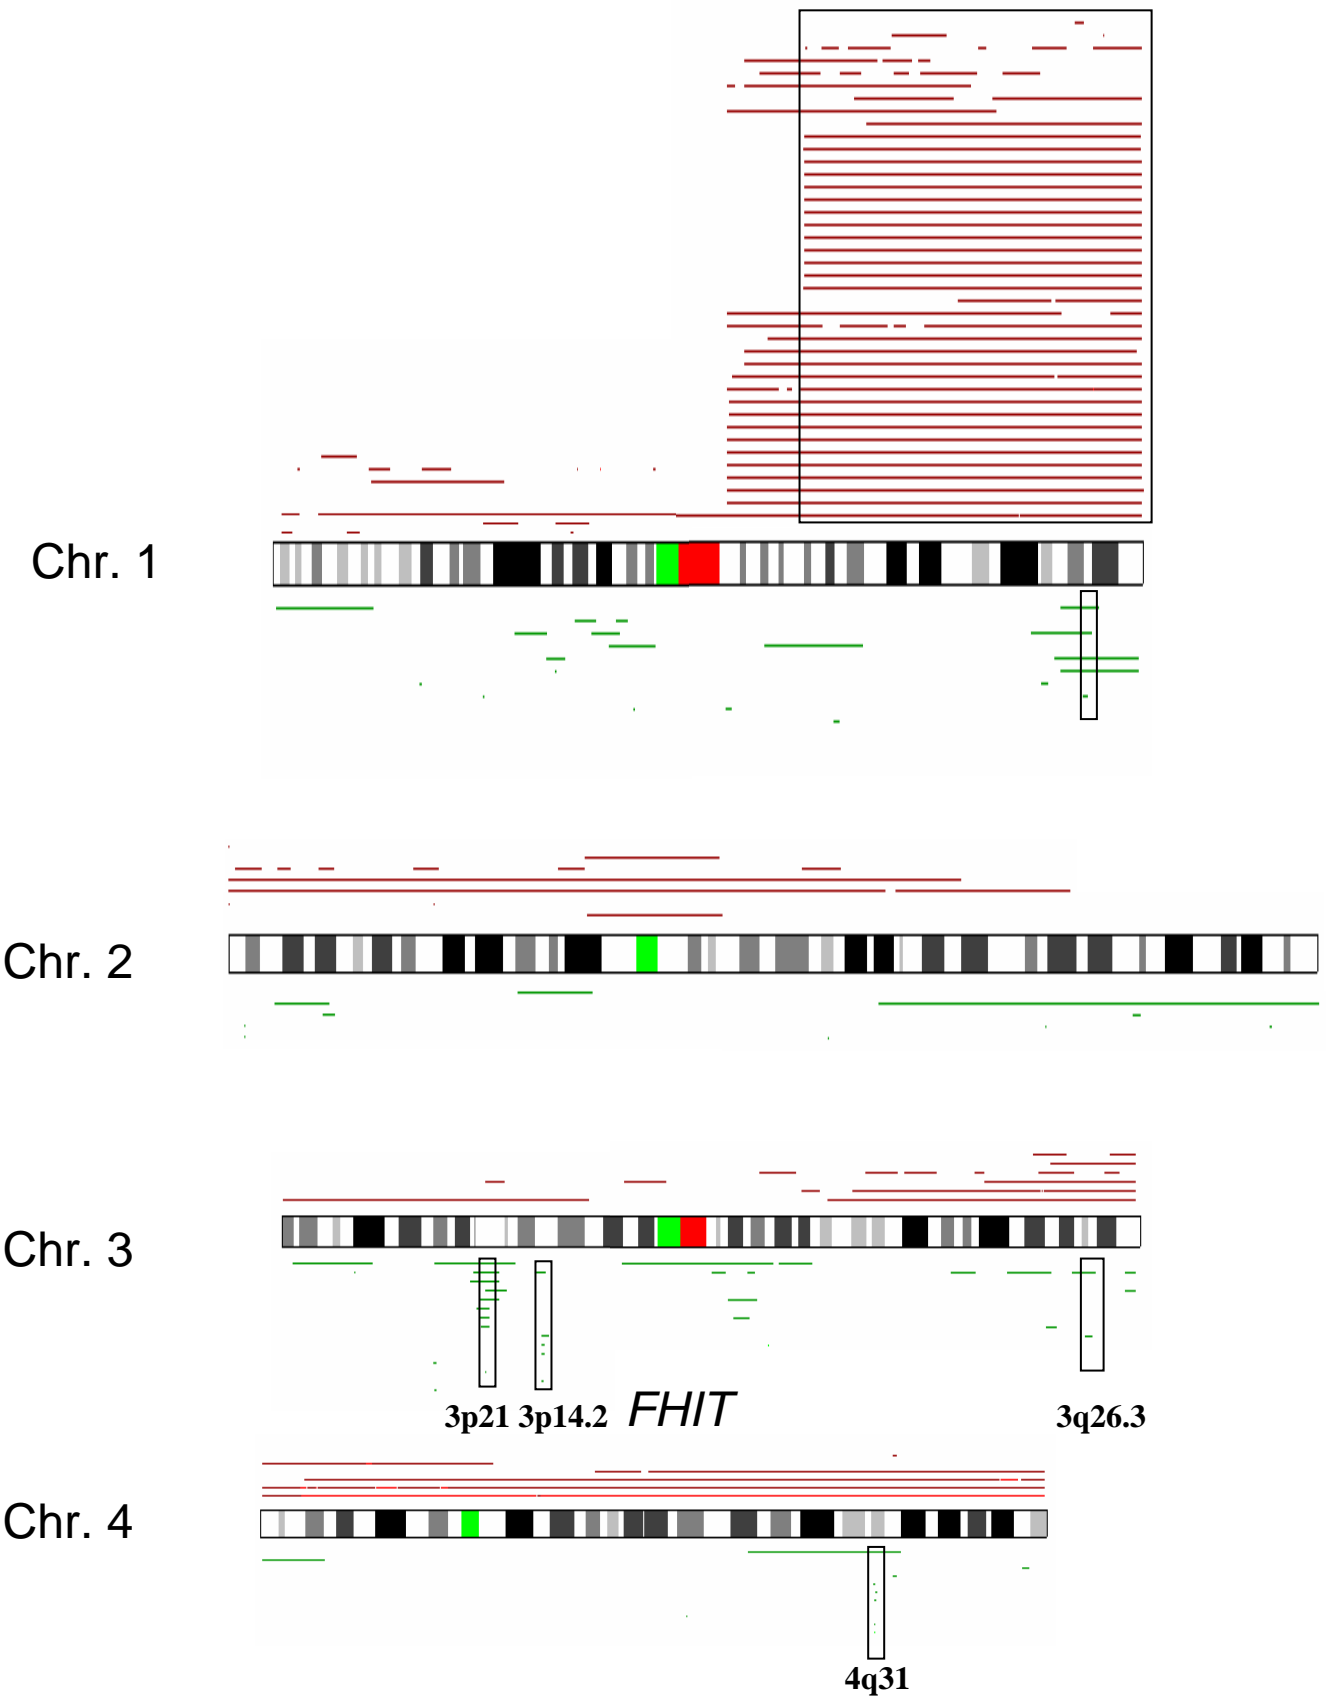

Chr 5

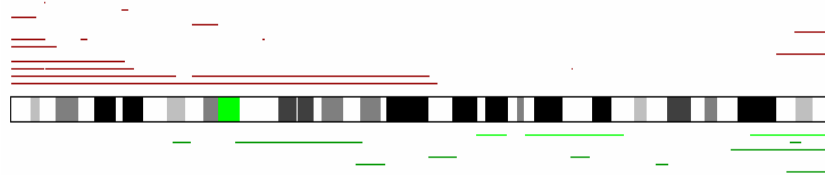

Chr. 6

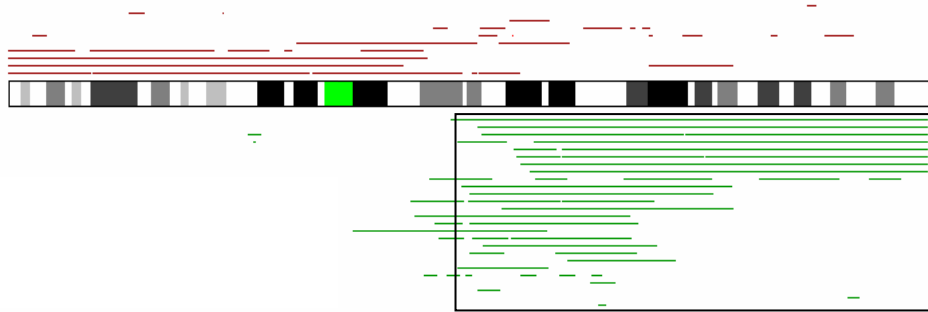

Chr. 7

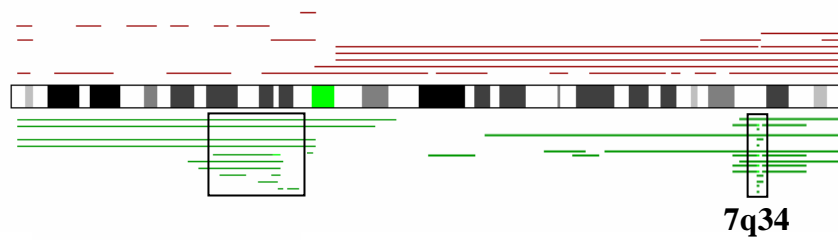

Chr. 8

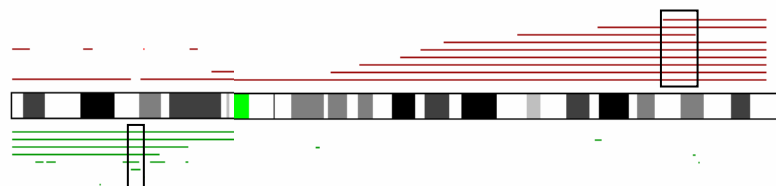

Chr. 10

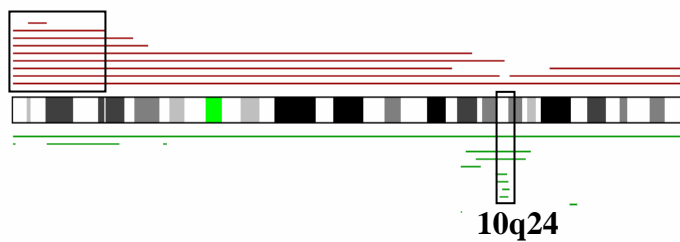

Chr. 11

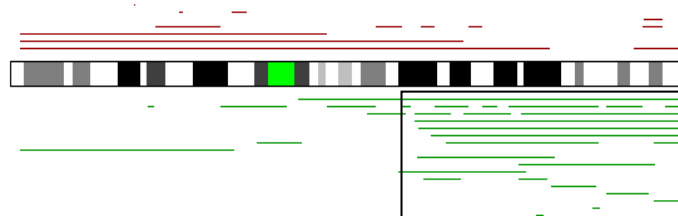

Chr. 13

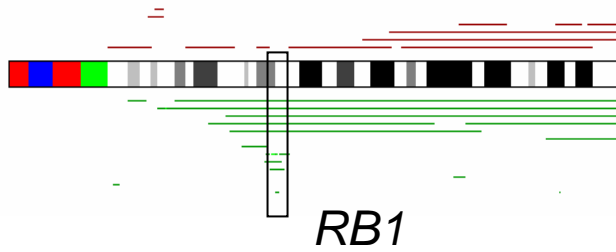

Chr. 14

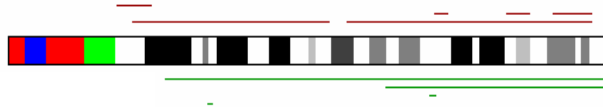

Chr. 15

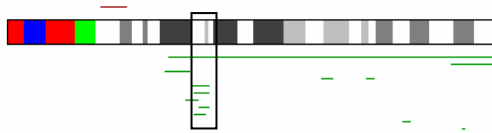

Chr. 16

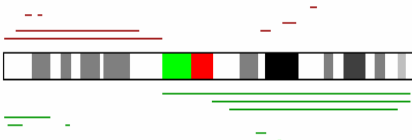

Chr. 17

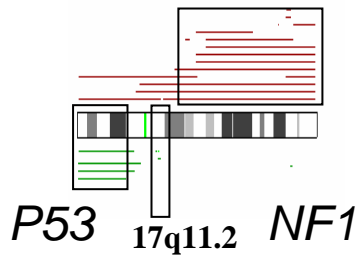

Chr. 18

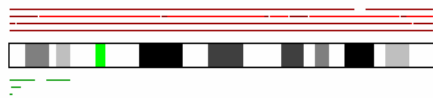

Chr. 19

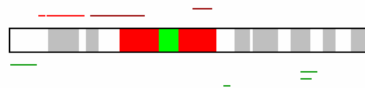

Chr. 20

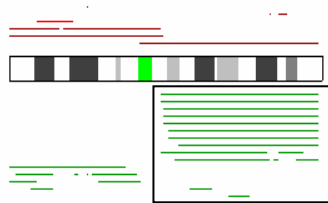

Chr. 21

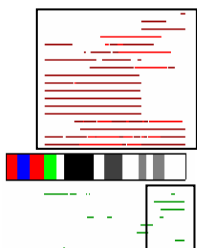

Chr. 22

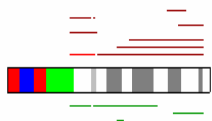

Chr. X

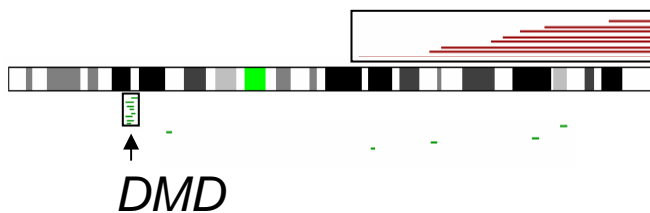

Supplement: blood_blood-2007-05-088310_4.pdf [file blood_blood-2007-05-088310_4.pdf]

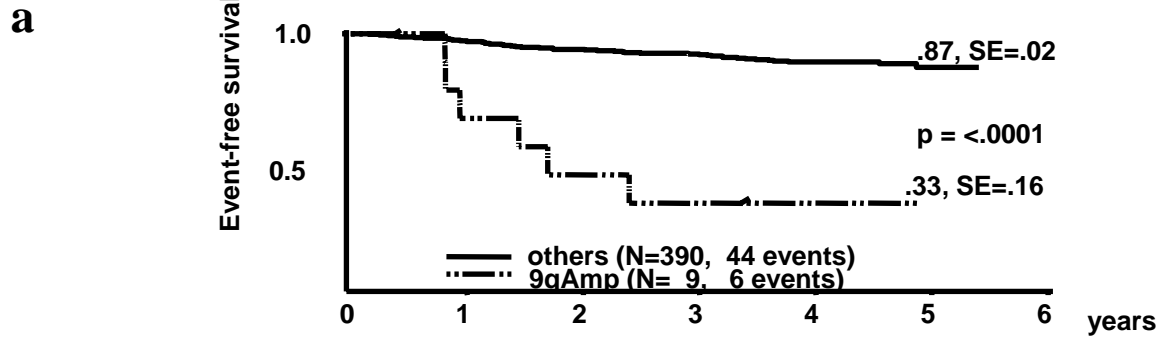

**3 cases of B-cell lineage ALL**

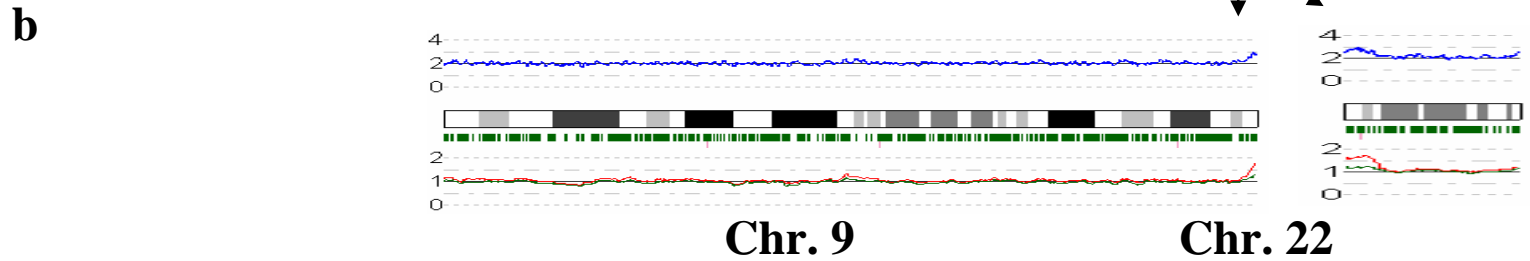

**2 cases of T-cell lineage ALL**

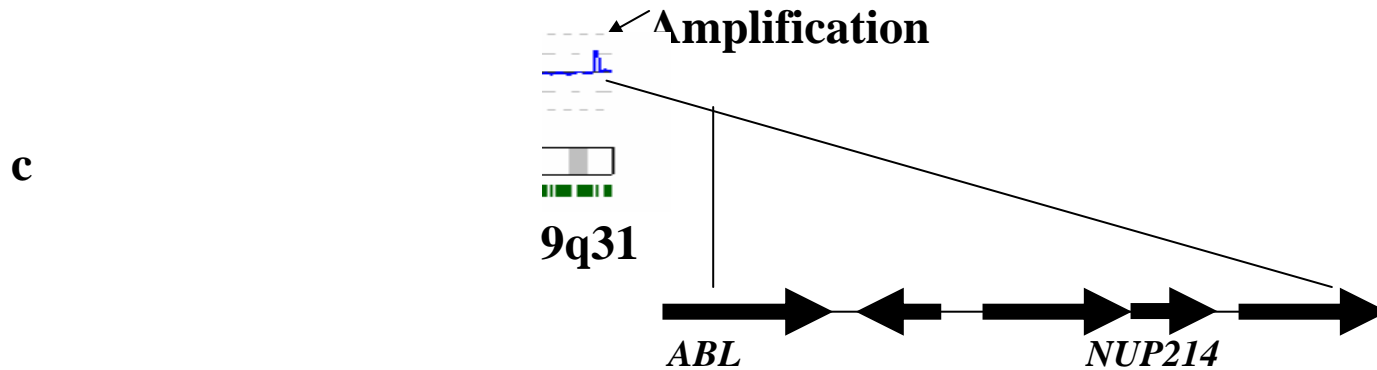

Supplement: blood_blood-2007-05-088310_5.pdf [file blood_blood-2007-05-088310_5.pdf]
